# Supplementary material
Source: PubMed Central journal article supplement (PMC3625315)
Supplement: 1301336110_pnas.201301336SI.pdf [file 1301336110_pnas.201301336SI.pdf]

# Supporting Information

Desmyter et al. 10.1073/pnas.1301336110

```
.....10!.....20!.....30!.....40!.....50!..abcdef....60!..
cAb-BP02 QVQLVESGGGLVQAGGSLRRLSCAASESTFSNYAMGWFRQAPGEREFVATISQ-----TGSHTYYRNS
cAb-BP03 DVQLVESGGGLVQAGGSLRRLSCVASGRTFSINTLSWFRQAPGKVERFVSGIEW-----SSGWPTYADS
cAb-BP07 DVQLVESGGGLVQAGTSRRLSCVASGTSFSRRQMGWFRQAPGKERFVVAAISG-----SGNWLVDVTS
cAb-BP09 QVQLVESGGGLVQPGGSLRRLSCVHSGSIFSDNAMGWYRQAPGNQREFVALITS-----GGNTNYADS
cAb-BP11 QVQLVESGGGLVQAGDSLRLSCAVSGRTFSSNVIGWFRQAPGKERFVVAISW-----STGSTYYGRS
cAb-BP13 QVQLVESGGGLVQAGDSLRLSCAASGRTFSGYAVAWFRQAPGKERFVVAIWRSGTGAYVYHADYAES
cAb-BP17 DVQLVESGGGLVQPGGSLRRLSCAASGTFSDDYAIGWFRQAPGKERFVSVYISM-----SDGRITYADS
cAb-BP18 QVQLVESGGGLVQPGGSLRRLSCVASGSIFSRAVMGWYRQAPGKERELVATITI-----HGYYTYADS
cAb-BP19 QVQLVESGGGLVQAGGSLRRLSCAASGRTFSSYAMGWFRQAPGKERFVVAISW-----STGSTYYAGS
cAb-Ta111 QVQLVESGGGLVQPGGSLRRLSCVASGRTFNTPDMGWFRQAPGNQREFVGRIRT-----SDGRITYADS
cAb-Ta118 QVQLVESGGGLVHPGGSLRRLSCAASGRTFSDYALGWFRQAPGKERFVVAISW-----SGGSTYYADS
cAb-Ta141 QVQLVESGGGLVQAGDSLRLSCAYSGRTFSGYRMGWFRQAPGKERFVGGPTS-----SSGIYYADS

.....70!.....80!..abc.....90!.....100!abcdefghijklnop.....110!...
cAb-BP02 VKGRFTISRDNKNTVYVYLMNMLKPEDTAVYYCAAGDNYYYTRTYEYDY-----WGQGTQVTVSS
cAb-BP03 VKGRFTISRPAKNTVYVYLMNMLKPEDTAVYYCAARRSAVGTIEY-----WGQGTQVTVSS
cAb-BP07 LQGRFTISRDNKNTVYVYLMNMLKPEDTAVYYCVSKEPTRWDSTLSGDVIRGYSY-----WGPGTQVTVSS
cAb-BP09 VKGRFTISRDNKSTVYVYLMNMLKPEDTAVYYCNTPYMRKEDDY-----WGPGTQVTVSS
cAb-BP11 MKGRCAASRDNAKNTVALQNLKPEDTAVYYCAATLDWGKTLSDYDY-----WGQGTQVTVSS
cAb-BP13 VRGRFTISRDNKNTVYVYLMNMLKLEDTAVYYCAATTRGVALIRPAGYDY-----WGQGTQVTVSS
cAb-BP17 VTGRFTISRDNKNTVYVYLMNMLKLEDTAVYYCAAGRFTVFGSAWVFGGGPYGIDY--WGKGLTVTVSS
cAb-BP18 VKGRFTISRDSAKNTVYVYLMNMLKPEDTAVYYCNALRGI PN DY-----WGPGTQVTVSS
cAb-BP19 VKGRFTISRDNKNTVYVYLMNMLKPEDTAVYYCAATLDWGKTLSEYDY-----WGQGTQVTVSS
cAb-Ta111 VKGRFTISRDAKNTVYVYLMNMLKPEDTAVYYCASRERIGQDYDY-----WGQGTQVTVSS
cAb-Ta118 VQGRFTISRDNKNTVYVYLMNMLKPEDTAVYYCAADKYTGPGGESVYDY-----WGRGTQVTVSS
cAb-Ta141 VNGRFTISRDAYKNTVYVYLMNMLKPEDTAVYYCAARTTTALYDY-----WGQGTQVTVSS
```

**Fig. S1.** Sequences of the nanobodies raised against TP901-1 baseplate or tail-associated lysozyme (Tal) protein (numbering according to the work by Kabat et al.) (1). CDR1, -2, and -3 are red, green, and blue, respectively.

1. Kabat EA, Wu TT, Perry HM, Gottesman KS, Foeller C (1991) *Sequences of Proteins of Immunological Interest*, ed Services USDoHaH (Public Health Service, National Institutes of Health, Bethesda, MD), 5th Ed.
